# Supplementary material for: A first investigation of hydrogeology and hydrogeophysics of theMaqu catchment in the Yellow River source region
Source: Copernicus journal article supplement (doi:10.5194/essd-2020-230), 2020-12-22
Supplement: Supplementary file [file essd-2020-230-AC2-supplement.pdf]

We would like to thank you for the positive and constructive feedback, which help improving the quality of the paper. You have pointed out issues that required further improvements or explanations. Below we addressed each specific issue and the manuscript has been updated accordingly.

-section 4.1: better to show the pictures of the core sediment

Thanks for this suggestion. The core lithology and a picture of the core sediment have been added to Figure 5.

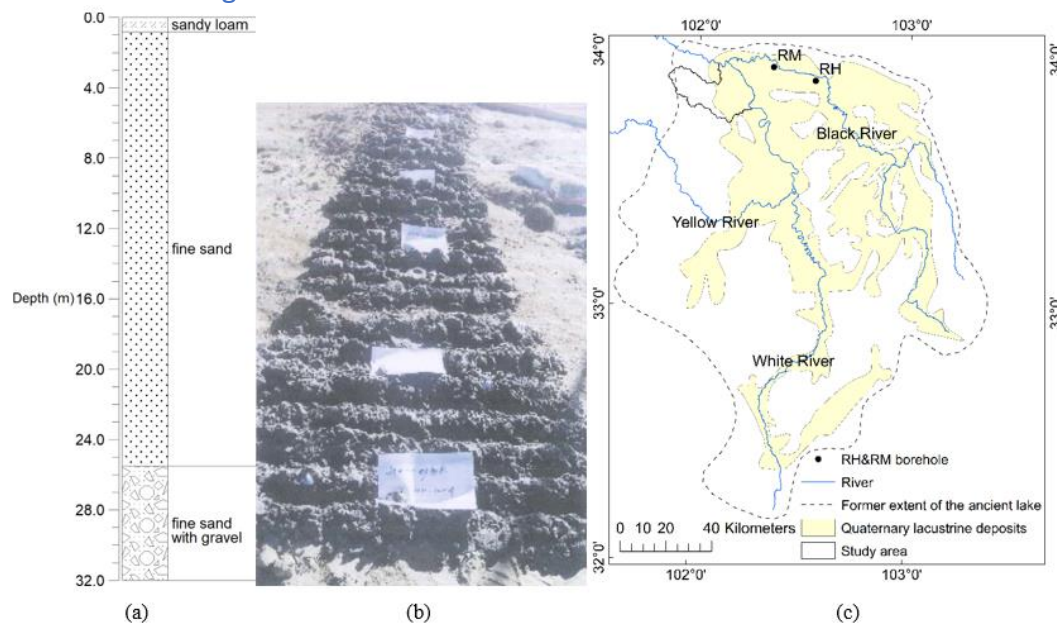

**Figure 5. Borehole information: (a) The core lithology of borehole ITC\_Maqu\_1; (b) A picture of the core sediment when the borehole was drilled; (c) Location of boreholes RM and RH (after Chen et al. (1999) ).**

-section 4.2: please discuss the potential reason for the different accuracy of the seven datasets.

Thanks a lot for this comment. The potential reasons for the different accuracy of the seven datasets have been discussed and added in section 4.2:

The DEMs' quality can be influenced by several factors, such as sensor type, algorithm, terrain type, and grid spacing. (Hebeler and Purves, 2009). In this study, grid spacings of DEMs are similar except for ALOS RT1, so the main factors that affect the accuracy of the DEMs should be sensor types and algorithms. For SRTM, the issue inherent to the production method is mast oscillations, while for ASTER and AW3D30, the issue is scene mismatch (Grohmann, 2018). As for radiometrically terrain corrected (RTC) products ALOS RT1 and ALOS RT2, the quality is directly related to the quality of the source DEM SRTM which was used in the RTC process. This results in very similar correlation coefficients of SRTM, ALOS RT1, and ALOS RT2, and obvious improvements in RMSE, MAE, and ME (Table 4).

-section 4.3: are there any data, table or figure showing that the soil thicknesses increase from the mountain top to the slope bottom?

Many thanks for pointing out this mistake. The sentence was deleted because the soil thickness is more related to slopes, rather than mountain top or bottom.

-Table 5: better to include elevation information also

Thanks for this suggestion, the elevation information has been added to Table 5.

**Table 5. Soil thickness measurements, locations of each measurement can be found in Figure 3.**

| No | Depth (cm) | Slope (°) | Elevation* (m) | No | Depth (cm) | Slope (°) | Elevation* (m) | No | Depth (cm) | Slope (°) | Elevation* (m) |
|----|------------|-----------|----------------|----|------------|-----------|----------------|----|------------|-----------|----------------|
| 1  | 39         | 9         | 3762           | 27 | 71         | 10        | 3509           | 53 | 102        | 6         | 3457           |
| 2  | 45         | 20        | 3769           | 28 | 90         | 11        | 3503           | 54 | 102        | 14        | 3459           |
| 3  | 28         | 25        | 3777           | 29 | >120       | 5         | 3493           | 55 | 104        | 6         | 3460           |
| 4  | 48         | 16        | 3784           | 30 | 110        | 5         | 3488           | 56 | 100        | 13        | 3462           |
| 5  | 50         | 22        | 3783           | 31 | >120       | 5         | 3482           | 57 | 92         | 10        | 3469           |
| 6  | 46         | 14        | 3775           | 32 | >107       | 2         | 3473           | 60 | 40         | 9         | 3491           |
| 7  | 39         | 25        | 3770           | 33 | >110       | 4         | 3479           | 61 | 53         | 6         | 3480           |
| 8  | 34         | 41        | 3757           | 34 | 59         | 13        | 3488           | 62 | 61         | 15        | 3478           |
| 9  | 37         | 22        | 3750           | 35 | 85         | 13        | 3491           | 63 | 70         | 7         | 3476           |
| 10 | 42         | 19.5      | 3734           | 36 | 60         | 20        | 3502           | 64 | 63         | 14        | 3468           |
| 11 | 23         | 20        | 3732           | 37 | 92         | 13        | 3517           | 65 | 61         | 9         | 3467           |
| 12 | 52         | 0         | 3461           | 38 | 38         | 10        | 3452           | 66 | 87         | 10        | 3458           |
| 13 | 42         | 3         | 3462           | 39 | 41         | 20        | 3461           | 67 | 60         | 5         | 3496           |
| 14 | 35         | 3         | 3463           | 40 | 76         | 30        | 3472           | 68 | 63         | 7         | 3487           |
| 15 | 38         | 4         | 3470           | 41 | 55         | 30        | 3483           | 69 | 68         | 15        | 3474           |
| 16 | 50         | 9         | 3474           | 42 | 32         | 40        | 3501           | 70 | 87         | 18        | 3554           |
| 17 | 40         | 10        | 3482           | 43 | 80         | 35        | 3519           | 71 | 30         | 14        | 3562           |
| 18 | 38         | 10        | 3489           | 44 | 27         | 30        | 3530           | 72 | 85         | 20        | 3572           |
| 19 | 42         | 15        | 3502           | 45 | 49         | 30        | 3522           | 73 | 41         | 17        | 3587           |
| 20 | 37         | 8         | 3494           | 46 | 52         | 30        | 3514           | 74 | 83         | 13        | 3596           |
| 21 | 40         | 10        | 3488           | 47 | 43         | 20        | 3500           | 75 | 67         | 27        | 3612           |
| 22 | 30         | 5         | 3475           | 48 | 44         | 22        | 3484           | 76 | 63         | 20        | 3605           |
| 23 | 30         | 4         | 3472           | 49 | 30         | 25        | 3475           | 77 | >110       | 20        | 3593           |
| 24 | 35         | 4         | 3469           | 50 | 74         | 14        | 3470           | 78 | >110       | 10        | 3574           |
| 25 | 28         | 1         | 3463           | 51 | 37         | 12        | 3464           | 79 | 42         | 15        | 3564           |
| 26 | 29         | 0         | 3459           | 52 | 81         | 6         | 3447           |    |            |           |                |

\*Elevations were extracted from ALOS PALSAR RT1.

-section 4.4.2: the equations should be described in section 3.

Thanks for this comment. The equations have been moved to section 3.4.2 Aquifer tests part.

Technical corrections-Line 148: change "the data was" to "the data were"

Thanks a lot. Corrected.

-Figure 9: should "2019 water table depth (m)" be "hydraulic conductivity (m/d)"?

It is 2019 water table depth (m). I put it in Figure 9 because those hydraulic conductivity values were obtained in 2019. Now it is removed to avoid confusion.

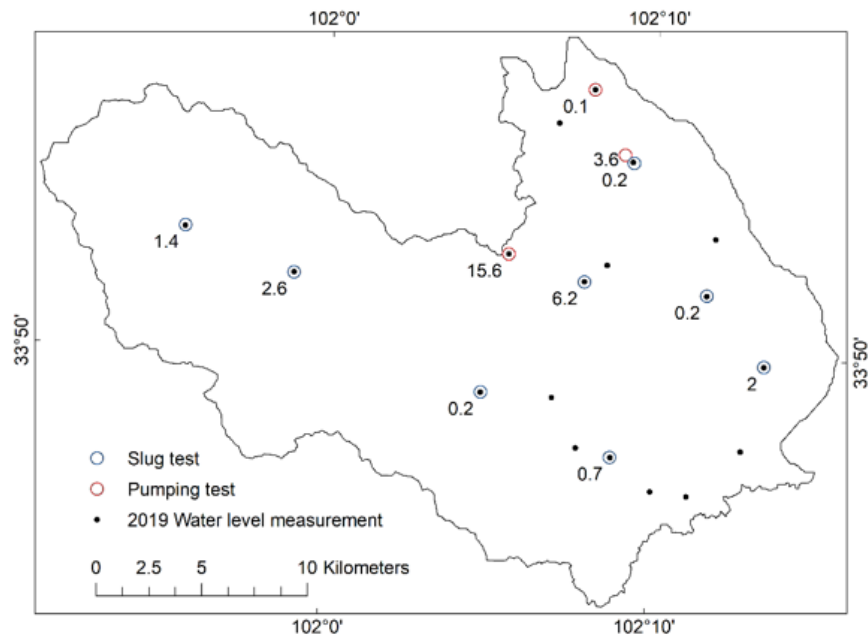

Figure 9. Hydraulic conductivity (m.d<sup>-1</sup>) obtained from aquifer tests, east of Maqu catchment.
